# Supplementary material
Source: MDPI journal article supplement (https://www.mdpi.com/2071-1050/8/11/1185)
Supplement: s1 [file s1]

# Supplementary Materials: Sustainability Assessment in Automotive and Electronics Supply Chains—A Set of Indicators Defined in a Multi-Stakeholder Approach

Josef-Peter Schögl, Morgane M. C. Fritz and Rupert J. Baumgartner

This document provides the full list of 69 supply chain indicators in Table S1. Table S2 lists the standards and templates used for the estimation of the maturity of sustainability data exchange in the European automotive and electronics industries.

**Table S1.** Full list of 69 supply chain sustainability indicators. Rank refers to the rank the sustainability aspect received in Fritz et al. [18]; \* For each environmental or social commitment indicator in addition to the answer to the yes/no questions a text description is required. This is not indicated in the table in order to improve readability. Italic = additional indicators.

| Compliance |                                             |                                                                                                |                                                                                                                          |                                  |               |                  |
|------------|---------------------------------------------|------------------------------------------------------------------------------------------------|--------------------------------------------------------------------------------------------------------------------------|----------------------------------|---------------|------------------|
| Rank       | Sustainability Aspect                       | Governance Level                                                                               | Compliance Performance Level                                                                                             |                                  |               |                  |
|            |                                             |                                                                                                | Indicator                                                                                                                | Equation                         | Unit          | Sources          |
| 8          | Compliance with environmental regulations   | Are you compliant with the environmental regulations of your country? (i.e., REACH, RoHS, ELV) | Fines due to non-compliance with environmental regulation                                                                | Total value of fines             | EUR           | [5,51,57]        |
|            |                                             |                                                                                                | <i>Incidents due to non-compliance with environmental regulations</i>                                                    | <i>Total number of incidents</i> | <i>Number</i> | <i>[5,51,57]</i> |
| 15         | Compliance with social regulations          | Are you compliant with the social regulations of your country?                                 | Fines due to non-compliance with social regulation (e.g., anti-competitive behavior, anti-trust, monopoly, bribery, ...) | Total value of fines             | EUR           | [5,51,57]        |
|            |                                             |                                                                                                | <i>Incidents due to non-compliance with social regulations</i>                                                           | <i>Total number of incidents</i> | <i>Number</i> | <i>[5,51,57]</i> |
| 20         | Compliance with human rights regulations    | Are you compliant with the human rights regulations of your country?                           | Fines due to non-compliance with human rights regulation                                                                 | Total value of fines             | EUR           |                  |
|            |                                             |                                                                                                | <i>Incidents due to non-compliance with human rights regulations</i>                                                     | <i>Total number of incidents</i> | <i>Number</i> | <i>[5,51,57]</i> |
| 2, 26      | Compliance with product related regulations | Are you compliant with product related regulations of your country?                            | Fines due to non-compliance with product related regulation                                                              | Total value of fines             | EUR           | [5,51,57]        |
|            |                                             |                                                                                                | <i>Incidents due to non-compliance with product related regulations</i>                                                  | <i>Total number of incidents</i> | <i>Number</i> | <i>[5,51,57]</i> |

Table S1. Cont.

| Management Systems and Standards |                                                  |                                                                                                                     |                                                                 |                                                           |             |         |
|----------------------------------|--------------------------------------------------|---------------------------------------------------------------------------------------------------------------------|-----------------------------------------------------------------|-----------------------------------------------------------|-------------|---------|
| Rank                             | Sustainability Aspect                            | Governance Level                                                                                                    | Management Systems and Standards Performance Level              |                                                           |             |         |
|                                  |                                                  |                                                                                                                     | Indicator                                                       | Equation                                                  | Unit        | Sources |
| 10                               | Environmental management Systems                 | Do you have any environmental management system? If yes, which one? (Tickbox: ISO 14001, EMAS, EN 16001, ISO 50001) | Monitoring of the environmental management system               | Number of days since last self-assessment                 | Days        |         |
|                                  |                                                  |                                                                                                                     |                                                                 | <i>Number of days since last audit?</i>                   | <i>Days</i> |         |
| 8                                | Social management systems                        | Do you have any social management system? If yes, which one? (Tickbox: SA 8000; ONR192500)                          | Monitoring of the social management system                      | Number of days since last self-assessment                 | Days        |         |
|                                  |                                                  |                                                                                                                     |                                                                 | <i>Number of days since last audit?</i>                   | <i>Days</i> |         |
| 18                               | Quality management systems                       | Do you have any quality management system? If yes, which one? (Tickbox: ISO 9001)                                   | Monitoring of the quality management system                     | Number of days since last self-assessment                 | Days        |         |
|                                  |                                                  |                                                                                                                     |                                                                 | <i>Number of days since last audit?</i>                   | <i>Days</i> |         |
| 28                               | Health and Safety Management system              | Do you have any health and safety management system? (if yes, which one? SCC?)                                      | Monitoring of the health and safety management system           | Number of days since last self-assessment                 | Days        |         |
|                                  |                                                  |                                                                                                                     |                                                                 | <i>Number of days since last audit?</i>                   | <i>Days</i> |         |
| 19                               | Stakeholder inclusiveness                        | Are you committed to the inclusion of stakeholders? *                                                               | Conducted stakeholder mapping and active stakeholder engagement | Number of stakeholder dialogues per year                  | Number      |         |
| 33                               | Special initiatives for sustainable R&D expenses | Are you committed to special initiatives for sustainable R&D? *                                                     | R&D expenses related to sustainability                          | R&D expenses related to sustainability/Total R&D expenses | %           | [49,57] |

Table S1. Cont.

| Environment |                             |                                                                                                                              |                                                                                                      |                                                                                                                                                           |        |               |
|-------------|-----------------------------|------------------------------------------------------------------------------------------------------------------------------|------------------------------------------------------------------------------------------------------|-----------------------------------------------------------------------------------------------------------------------------------------------------------|--------|---------------|
| Rank        | Sustainability Aspect       | Environmental commitment Level *                                                                                             | Environmental Performance Level                                                                      |                                                                                                                                                           |        |               |
|             |                             |                                                                                                                              | Indicator                                                                                            | Equation                                                                                                                                                  | Unit   | Sources       |
| 1           | Hazardous substances        |                                                                                                                              | Substances of Very High Concern (SVHC)                                                               | Total amount of each SVHC                                                                                                                                 | kg     | [24,57]       |
| 3           | Wastes management           | Are you committed to waste management (e.g., prevention, reduction, reuse, safe disposal)?                                   | Total amount of solid wastes generated by type                                                       | $\Sigma$ Solid wastes produced and generated by type                                                                                                      | kg     | [24,51]       |
|             |                             |                                                                                                                              | <i>Total amount of solid wastes reused, recycled, landfilled per type</i>                            | $\Sigma$ <i>Solid wastes reused, recycled, landfilled per type</i>                                                                                        | kg     | [24,51,56,57] |
| 4           | GHG and other air emissions | Are you committed towards the reduction and prevention of GHG and other air emissions?                                       | Total direct and indirect GHG-emissions from energy demand (Scope 1 and 2 according to GHG-protocol) | $\Sigma$ CO <sub>2</sub> equivalent                                                                                                                       | kg     | [24,51]       |
|             |                             |                                                                                                                              | <i>Other relevant indirect emissions by weight (Scope 3 according to the GHG-protocol)</i>           | $\Sigma$ CO <sub>2</sub> equivalent                                                                                                                       | kg     | [24,51]       |
|             |                             |                                                                                                                              | <i>Emissions of ozone-depleting substances by weight</i>                                             | $\Sigma$ CFC-11 equivalent                                                                                                                                | kg     | [24,51]       |
|             |                             |                                                                                                                              | <i>NO<sub>x</sub>, SO<sub>x</sub> and other significant air emissions by type and weight</i>         | $\Sigma$ <i>Other significant air emissions by type</i>                                                                                                   | kg     | [24,51]       |
| 6           | Energy consumption          | Are you committed towards the reduction of energy consumption?                                                               | Energy consumption                                                                                   | Total energy consumption (incl. self-generated and purchased)                                                                                             | Joules | [24,51]       |
| 29          |                             |                                                                                                                              | <i>Renewable energy sources</i>                                                                      | <i>Total amount of renewable energy per source (solar, wind, ocean, hydro-power, hydrogen from renewable sources, biofuels, geothermal, biomass, ...)</i> | Joules | [24,51]       |
| 22          | Materials                   | Are you committed towards a sustainable use of materials? (e.g.: resource efficiency, use of recycled materials, eco-design) | Use of renewable materials                                                                           | Weight of materials that are renewable/Total weight of materials                                                                                          | %      | [24]          |
|             |                             |                                                                                                                              | <i>Use of recycled materials</i>                                                                     | <i>Weight of materials that are recycled material/Total weight of materials</i>                                                                           | %      | [24]          |
|             |                             |                                                                                                                              | <i>Recyclability of the product</i>                                                                  | <i>Total weight of recyclable materials/Total weight of materials</i>                                                                                     | %      | [24]          |
| 23          | Water                       | Are you committed towards the reduction of water consumption?                                                                | Total use of water per year                                                                          | Total use of water/year                                                                                                                                   | %      | [24]          |
|             |                             |                                                                                                                              | <i>Reuse of water</i>                                                                                | <i>Water reused/Total use of water</i>                                                                                                                    | %      | [24]          |
| 34          | Biodiversity                | Are you committed towards the reduction of the impact of your activities, products and services on biodiversity?             | Number of identified impacts on biodiversity                                                         | Total number of impacts identified                                                                                                                        | Number | [51]          |
|             |                             |                                                                                                                              | <i>Number of measures to reduce identified impacts on biodiversity</i>                               | <i>Total number of measures to reduce identified impacts</i>                                                                                              | Number | [51]          |

Table S1. Cont.

| Rank | Sustainability Aspect          | Social Commitment Level *                                              | Social                                                                 |                                                                                                                                                                        |        |            |
|------|--------------------------------|------------------------------------------------------------------------|------------------------------------------------------------------------|------------------------------------------------------------------------------------------------------------------------------------------------------------------------|--------|------------|
|      |                                |                                                                        | Indicator                                                              | Equation                                                                                                                                                               | Unit   | Sources    |
| 7    | No corruption and bribery      | Are you committed to avoid corruption and bribery?                     | Incidents of corruption                                                | $\sum$ Incidents of corruption                                                                                                                                         | Number | [5,51,56]  |
| 9    | Prohibition of child labor     | Are you committed to the abolition of child labor?                     | Incidents of child labor                                               | $\sum$ Incidents of child labor                                                                                                                                        | Number | [5,51,56]  |
| 11   | Occupational Health and Safety | Are you committed to ensure workers health & safety?                   | Injuries, occupational diseases, lost days, absenteeism and fatalities | (Total number of injuries $\times$ working hours per week $\times$ working weeks)/Total amount of hours worked by all employees per year                               | %      | [56,60]    |
|      |                                |                                                                        |                                                                        | (Total number of occupational diseases cases $\times$ working hours per week $\times$ working weeks)/Total amount of hours worked by all employees per year            | %      | [24,51,60] |
|      |                                |                                                                        |                                                                        | (Total number of lost days $\times$ working hours per week $\times$ working weeks)/Total amount of hours worked by all employees per year                              | %      | [24,51,60] |
|      |                                |                                                                        |                                                                        | (Total number of missed (absentee) days over the period $\times$ working hours per week $\times$ working weeks)/Total amount of hours worked by all employees per year | %      | [24,51,60] |
|      |                                |                                                                        |                                                                        | (Total number of fatalities $\times$ working hours per week $\times$ working weeks)/Total amount of hours worked by all employees per year                             | %      | [24,51,60] |
| 13   |                                |                                                                        | Employees receiving OHS training                                       | Total number of trained employees on OHS/Total number of all employees                                                                                                 | %      | [56]       |
| 14   | Employee training              | Are you committed to continuous skills improvement of your employees?  | Training per employee per year                                         | Total training hours/<br>Total number of employees                                                                                                                     | %      | [51]       |
| 16   | Non-discrimination             | Are you committed to ensure that no employee is discriminated against? | Incidents of discrimination                                            | Total number of incidents of discrimination/<br>Total number of employees                                                                                              | %      | [51]       |

Table S1. Cont.

| Rank | Sustainability Aspect                                                                    | Social Commitment Level *                                                                                                    | Social                                                       |                                                                                                             |        |         |
|------|------------------------------------------------------------------------------------------|------------------------------------------------------------------------------------------------------------------------------|--------------------------------------------------------------|-------------------------------------------------------------------------------------------------------------|--------|---------|
|      |                                                                                          |                                                                                                                              | Indicator                                                    | Social Performance Level                                                                                    |        |         |
|      |                                                                                          |                                                                                                                              |                                                              | Equation                                                                                                    | Unit   | Sources |
| 17   | Use of conflict minerals                                                                 |                                                                                                                              | Conflict minerals used                                       | Amount of Tantalum, Tin, Tungsten, Gold used                                                                | kg     | [52]    |
| 21   | Securing minimum wages                                                                   | Are you committed to securing minimum wages for your employees?                                                              | Employees covered by minimum wages                           | Total number of employees covered by at least the legal local minimum wages/Total number of employees       | %      | [56]    |
| 25   | Confidentiality of data                                                                  | Are you committed to protect your customers and employee's confidential data?                                                | Confidentiality of data                                      | $\Sigma$ Conflicts regarding disclosure of confidential data                                                | Number | -       |
| 30   | Freedom of association and collective bargaining, protection of worker's representatives | Are you committed to respect the freedom of association, collective bargaining and protection of worker's representatives?   | Freedom of association and collective bargaining             | Number of incidents of violations of freedom of association                                                 | Number | [51]    |
|      |                                                                                          |                                                                                                                              | <i>Employees covered by collective bargaining agreements</i> | <i>Total number of employees covered by collective bargaining agreements/ Total number of all employees</i> | %      | [51]    |
| 32   | Community engagement                                                                     | Are you committed to the consultation of local communities and the respect for cultures and traditions of local communities? | Expenses for local community projects and donations          | $\Sigma$ Expenses                                                                                           | EUR    | [24]    |
|      | Gender awareness                                                                         | Are you committed to an equal treatment of men and women?                                                                    | Female employees in the company                              | Total number of female employees/ Total number of employees                                                 | %      | [51]    |

Table S2. Overview of identified standards and templates for supply chain sustainability data exchange ( $n = 24$ ).

| Maturity of Standardization | Name of Standard/Template                                                                                                                                                                                                                   |
|-----------------------------|---------------------------------------------------------------------------------------------------------------------------------------------------------------------------------------------------------------------------------------------|
| Fully structured (5)        | IMDS, IEC 62575, IPC 1752, IPC 1755, IEC/PAS 62545                                                                                                                                                                                          |
| Semi-structured (19)        | ISO14064, ISO 50001, ISO 14051, ISO 14052, ISO 14046, EN 16231:2012, EN 16231:2013, EN 16231:2014, LCA, SMETA, GHG Protocol, Voluntary Carbon Standard 2007, EICC Carbon Reporting System, BSCI, WRAP, OHSAS 18001, ROHS-Template, ETI Code |
